# Supplementary material for: Probability of hospitalisation and death among COVID-19 patients with comorbidity during outbreaks occurring in Mexico City
Source: PubMed Central journal article supplement (PMC9639670; doi:10.7189/jogh.12.05038), 2022-11-08
Supplement: jogh-12-05038-s001.pdf [file jogh-12-05038-s001.pdf]

## ONLINE SUPPLEMENTARY DOCUMENT

**Title:** PROBABILITY OF HOSPITALIZATION AND DEATH AMONG COVID-19 PATIENTS WITH COMORBIDITY DURING OUTBREAKS OCCURRING IN MEXICO CITY.

**Authors:** José Sifuentes-Osornio<sup>1\*</sup>, Ofelia Angulo-Guerrero<sup>2\*</sup>, Guillermo De-Anda-Jáuregui<sup>3,4\*</sup>, Juan L. Díaz-De-León-Santiago<sup>2\*</sup>, Enrique Hernández-Lemus<sup>3,4</sup>, Héctor Benítez-Pérez<sup>7</sup>, Luis A. Herrera<sup>3,6</sup>, Oliva López-Arellano<sup>2</sup>, Arturo Revuelta-Herrera<sup>2</sup>, Ana R. Rosales-Tapia<sup>5</sup>, Rosaura Ruiz-Gutiérrez<sup>2,8</sup>, Manuel Suárez-Lastra<sup>5</sup>, David Kershenobich<sup>1</sup>.

**Table S1. Contingency table used to perform 1) Comparison between hospitalized patients during either of the two waves and in the interwave period and 2) Comparison between hospitalized patients in the first peak and the second peak.**

|          | Death                       | No death                                                       |
|----------|-----------------------------|----------------------------------------------------------------|
| Period A | The death count in Period A | Survivor (cases that did not end with death) count in Period A |
| Period B | The death count in Period B | Survivor (cases that did not end with death) count in Period B |

**Table S2. Global lethality probability of COVID-19 patients by age group and period.**

| Age group (years) | <i>1<sup>st</sup> wave</i> | <i>Interwave Period</i> | <i>2<sup>nd</sup> wave</i> |
|-------------------|----------------------------|-------------------------|----------------------------|
| 20-39             | 0.024                      | 0.005                   | 0.005                      |
| 40-59             | 0.122                      | 0.042                   | 0.039                      |
| 60-79             | 0.359                      | 0.193                   | 0.167                      |
| ≥ 80              | 0.498                      | 0.391                   | 0.328                      |

Bayes probability test.

**Table S3: Mortality probability of hospitalized COVID-19 patients by age group and period.**

| Age group (years) | <i>1<sup>st</sup> wave</i> | <i>Interwave period</i> | <i>2<sup>nd</sup> wave</i> |
|-------------------|----------------------------|-------------------------|----------------------------|
| 20-39             | 0.185                      | 0.116                   | 0.228                      |
| 40-59             | 0.368                      | 0.274                   | 0.418                      |
| 60-79             | 0.577                      | 0.486                   | 0.560                      |

|     |       |       |       |
|-----|-------|-------|-------|
| ≥80 | 0.673 | 0.630 | 0.682 |
|-----|-------|-------|-------|

Bayes probability test

**Table S4. Frequencies of people with diabetes mellitus, positive for SARS-CoV-2 infection, hospitalized and deceased during the first wave (15 weeks, between March 23 to July 12, 2020).**

| Age group (years) | People with diabetes | People with SARS-CoV-2 infection | People with COVID-19 and hospitalized | Deceased people with COVID-19 | People with COVID-19, hospitalized and deceased |
|-------------------|----------------------|----------------------------------|---------------------------------------|-------------------------------|-------------------------------------------------|
| 20-39             | 1970                 | 940                              | 314                                   | 123                           | 106                                             |
| 40-59             | 11812                | 6017                             | 2754                                  | 1399                          | 1245                                            |
| 60-79             | 9225                 | 5299                             | 3321                                  | 2202                          | 1980                                            |
| >80               | 1316                 | 703                              | 490                                   | 374                           | 332                                             |

**Table S5. Frequencies of people with diabetes mellitus, positive for SARS-CoV-2 infection, hospitalized and deceased during the interwave period (14 weeks, July 13 to October 25, 2020).**

| Age group (years) | People with diabetes | People with SARS-CoV-2 infection | People with COVID-19 and hospitalized | Deceased people with COVID-19 | People with COVID-19, hospitalized and deceased |
|-------------------|----------------------|----------------------------------|---------------------------------------|-------------------------------|-------------------------------------------------|
| 20-39             | 2661                 | 1001                             | 166                                   | 37                            | 35                                              |
| 40-59             | 16669                | 6607                             | 1723                                  | 643                           | 598                                             |
| 60-79             | 13409                | 5790                             | 2620                                  | 1473                          | 1373                                            |
| >80               | 1615                 | 751                              | 475                                   | 328                           | 304                                             |

**Table S6. Frequencies of people with diabetes mellitus, positive for SARS-CoV-infection, hospitalized and deceased during the second wave (25 weeks, between 26 October 2020 to 29 March 2021).**

| Age group (years) | People with diabetes | People with SARS-CoV-2 infection | People with COVID-19 and hospitalized | Deceased people with COVID-19 | People with COVID-19, hospitalized and deceased |
|-------------------|----------------------|----------------------------------|---------------------------------------|-------------------------------|-------------------------------------------------|
| 20-40             | 10850                | 3407                             | 374                                   | 145                           | 137                                             |

|       |       |       |      |      |      |
|-------|-------|-------|------|------|------|
| 40-60 | 67455 | 22818 | 3993 | 2079 | 1920 |
| 60-80 | 52223 | 20483 | 6750 | 4513 | 4178 |
| >80   | 5442  | 2458  | 1226 | 903  | 839  |

**Table S7. Frequencies of people with hypertension, positive for SARS-CoV-2 infection, hospitalized and deceased during the first wave (15 weeks, March 23 to July 12, 2020).**

| Age group (years) | People with hypertension | People with SARS-CoV-2 infection | People with COVID-19 and hospitalized | Deceased people with COVID-19 | People with COVID-19, hospitalized and deceased |
|-------------------|--------------------------|----------------------------------|---------------------------------------|-------------------------------|-------------------------------------------------|
| 20-40             | 2691                     | 1124                             | 297                                   | 115                           | 94                                              |
| 40-60             | 13836                    | 6548                             | 2627                                  | 1269                          | 1125                                            |
| 60-80             | 11714                    | 6548                             | 3833                                  | 2515                          | 2248                                            |
| >80               | 2293                     | 1218                             | 817                                   | 623                           | 551                                             |

**Table S8. Frequencies of people with hypertension, positive for SARS-CoV-2 infection, hospitalized and deceased during the interwave period (14 weeks, July 13 to October 25, 2020).**

| Age group (years) | People with hypertension | People with SARS-CoV-2 infection | People with COVID-19 and hospitalized | Deceased people with COVID-19 | People with COVID-19, hospitalized and deceased |
|-------------------|--------------------------|----------------------------------|---------------------------------------|-------------------------------|-------------------------------------------------|
| 20-40             | 3889                     | 1313                             | 203                                   | 50                            | 46                                              |
| 40-60             | 21018                    | 7772                             | 1750                                  | 627                           | 584                                             |
| 60-80             | 18327                    | 7458                             | 3074                                  | 1696                          | 1576                                            |
| >80               | 2913                     | 1316                             | 764                                   | 543                           | 504                                             |

**Table S9. Frequencies of people with hypertension, positive for SARS-CoV-2 infection, hospitalized and deceased during the second wave (25 weeks, between Oct 26, 2020, to March 29, 2021).**

| Age group (years) | People with hypertension | People with SARS-CoV-2 infection | People with COVID-19 and hospitalized | Deceased people with COVID-19 | People with COVID-19, hospitalized and deceased |
|-------------------|--------------------------|----------------------------------|---------------------------------------|-------------------------------|-------------------------------------------------|
| 20-40             | 16464                    | 4815                             | 425                                   | 181                           | 171                                             |
| 40-60             | 86466                    | 27486                            | 4141                                  | 2185                          | 1999                                            |
| 60-80             | 72959                    | 27040                            | 8257                                  | 5446                          | 5049                                            |
| >80               | 10082                    | 4392                             | 2091                                  | 1547                          | 1437                                            |

**Table S10. Frequencies of people with obesity, positive for SARS-CoV-2 infection, hospitalized and deceased during the first wave (15 weeks, March 23 to July 12, 2020).**

| Age group (years) | People with obesity | People with SARS-CoV-2 infection | People with COVID-19 and hospitalized | Deceased people with COVID-19 | People with COVID-19, hospitalized and deceased |
|-------------------|---------------------|----------------------------------|---------------------------------------|-------------------------------|-------------------------------------------------|
| 20-40             | 11062               | 4698                             | 773                                   | 230                           | 195                                             |
| 40-60             | 16118               | 7834                             | 2600                                  | 1170                          | 1007                                            |
| 60-80             | 5049                | 2984                             | 1673                                  | 1094                          | 958                                             |
| >80               | 448                 | 247                              | 152                                   | 122                           | 104                                             |

**Table S11. Frequencies of people with obesity, positive for SARS-CoV-2 infection, hospitalized and deceased during the interwave period (15 weeks, July 13 to October 25, 2020).**

| Age group (years) | People with obesity | People with SARS-CoV-2 infection | People with COVID-19 and hospitalized | Deceased people with COVID-19 | People with COVID-19, hospitalized and deceased |
|-------------------|---------------------|----------------------------------|---------------------------------------|-------------------------------|-------------------------------------------------|
| 20-40             | 15966               | 5788                             | 473                                   | 88                            | 76                                              |
| 40-60             | 20720               | 8271                             | 1717                                  | 497                           | 454                                             |

|       |      |      |      |     |     |
|-------|------|------|------|-----|-----|
| 60-80 | 6635 | 3056 | 1370 | 722 | 670 |
| >80   | 506  | 240  | 153  | 110 | 102 |

**Table S12. Frequencies of people with obesity, positive for SARS-CoV-2 infection, hospitalized and deceased during the second wave (25 weeks, between October 26 to March 29, 2021).**

| Age group (years) | People with obesity | People with SARS-CoV-2 infection | People with COVID-19 and hospitalized | Deceased people with COVID-19 | People with COVID-19, hospitalized and deceased |
|-------------------|---------------------|----------------------------------|---------------------------------------|-------------------------------|-------------------------------------------------|
| 20-40             | 55280               | 16457                            | 1004                                  | 299                           | 273                                             |
| 40-60             | 65931               | 22055                            | 3713                                  | 1851                          | 1714                                            |
| 60-80             | 19573               | 8458                             | 3436                                  | 2258                          | 2120                                            |
| >80               | 1481                | 735                              | 436                                   | 321                           | 300                                             |

**Table S13. Probability of death of COVID-19 patients with diabetes mellitus according to age groups and pandemic waves.**

| Age group (years) | 1 <sup>st</sup> wave | Interwave | 2 <sup>nd</sup> wave |
|-------------------|----------------------|-----------|----------------------|
| 20-39             | 0.130                | 0.036     | 0.0425               |
| 40-59             | 0.232                | 0.097     | 0.091                |
| 60-79             | 0.415                | 0.254     | 0.220                |
| ≥80               | 0.532                | 0.436     | 0.367                |

**Table S14. Probability of death of COVID-19 patients with hypertension according to age groups and pandemic waves.**

| Age group (years) | 1 <sup>st</sup> wave | Interwave | 2 <sup>nd</sup> wave |
|-------------------|----------------------|-----------|----------------------|
| 20-39             | 0.102                | 0.038     | 0.037                |
| 40-59             | 0.193                | 0.080     | 0.079                |
| 60-79             | 0.384                | 0.227     | 0.201                |
| ≥80               | 0.511                | 0.412     | 0.352                |

**Table S15. Probability of death of COVID-19 patients with obesity according to age groups and pandemic waves.**

| Age group (years) | 1 <sup>st</sup> wave | Interwave | 2 <sup>nd</sup> wave |
|-------------------|----------------------|-----------|----------------------|
|-------------------|----------------------|-----------|----------------------|

|       |       |       |       |
|-------|-------|-------|-------|
| 20-39 | 0.048 | 0.015 | 0.018 |
| 40-59 | 0.149 | 0.060 | 0.083 |
| 60-79 | 0.366 | 0.236 | 0.266 |
| ≥80   | 0.493 | 0.458 | 0.436 |

**Table S16. Mortality probability of hospitalized COVID-19 patients with diabetes mellitus by age group and period.**

| Age group (years) | <i>1<sup>st</sup> wave</i> | <i>Interwave period</i> | <i>2<sup>nd</sup> wave</i> |
|-------------------|----------------------------|-------------------------|----------------------------|
| 20-39             | 0.338                      | 0.210                   | 0.366                      |
| 40-59             | 0.452                      | 0.347                   | 0.481                      |
| 60-79             | 0.596                      | 0.524                   | 0.619                      |
| ≥80               | 0.678                      | 0.640                   | 0.684                      |

Bayes probability test.

**Table S17: Mortality probability of hospitalized COVID-19 patients with hypertension by age group and period.**

| Age group (years) | <i>1<sup>st</sup> wave</i> | <i>Interwave period</i> | <i>2<sup>nd</sup> wave</i> |
|-------------------|----------------------------|-------------------------|----------------------------|
| 20-39             | 0.316                      | 0.227                   | 0.402                      |
| 40-59             | 0.428                      | 0.334                   | 0.483                      |
| 60-79             | 0.586                      | 0.513                   | 0.611                      |
| ≥80               | 0.674                      | 0.660                   | 0.687                      |

Bayes probability test.

**Table S18: Mortality probability of hospitalized COVID-19 patients with obesity by age group and period.**

| Age group (years) | <i>1<sup>st</sup> wave</i> | <i>Interwave period</i> | <i>2<sup>nd</sup> wave</i> |
|-------------------|----------------------------|-------------------------|----------------------------|
| 20-39             | 0.252                      | 0.161                   | 0.272                      |
| 40-59             | 0.387                      | 0.264                   | 0.462                      |
| 60-79             | 0.572                      | 0.489                   | 0.617                      |
| ≥80               | 0.684                      | 0.667                   | 0.688                      |

Bayes probability test.

**Table S19. Comparison of lethality (in ambulatory and hospitalized patients) between interwave period and the second wave.**

| Age group (years) | Comorbidities | CFR_interwave | CFR_2nd wave | Difference-CFR | FDR      |
|-------------------|---------------|---------------|--------------|----------------|----------|
| [60,79)           | DM; AHP       | 27.72         | 22.06        | -5.66          | 9.72E-08 |
| [60,79)           | None          | 15.25         | 12.78        | -2.46          | 2.24E-06 |

|          |                  |       |       |       |          |
|----------|------------------|-------|-------|-------|----------|
| [40,59)  | Obes             | 4.48  | 6.10  | 1.62  | 2.26E-04 |
| [40,59)  | AHP; Obes        | 6.43  | 9.82  | 3.40  | 7.25E-04 |
| [40,59)  | DM; AHP;<br>Obes | 11.45 | 16.49 | 5.03  | 3.53E-03 |
| [80,100) | DM; AHP          | 44.61 | 36.19 | -8.41 | 8.85E-03 |
| [60,79)  | Obes             | 18.61 | 23.20 | 4.58  | 2.20E-02 |
| [80,100) | none             | 34.56 | 29.18 | -5.38 | 3.09E-02 |
| [40,59)  | DM; AHP          | 13.63 | 11.28 | -2.35 | 3.38E-02 |
| [60,79)  | DM               | 20.11 | 17.48 | -2.62 | 4.13E-02 |

DM: diabetes mellitus; AHP: hypertension arterial; Obes: obesity; CFR-wave: cases occurred in either peak; difference-CFR: the difference between CFR-wave and CFR-interwave; CFR-interwave: cases occurred during the interpeak period; statistical significant value: FDR<0.05. Periods: interwave: Epidemiological weeks 29-43 of 2020 (14 weeks, July 13 to October 25). Second wave: Epidemiological weeks 44/2020 -13/2021 (25 weeks, October 26 to March 29). Fisher exact test with BH correction used to estimate significance. Positive values in Difference-CFR represent **increases** in lethality. Negative values in Difference-CFR **represent decreases in** lethality.
